# Supplementary material for: A degron system targeting endogenous PD-1 inhibits the growth of tumor cells in mice
Source: PubMed Central journal article supplement (PMC9204894; doi:10.1093/narcan/zcac019), 2022-06-17
Supplement: zcac019_supplemental_file.pdf [file zcac019_supplemental_file.pdf]

## Supplementary Data

### Figures and Tables

Figure S1. Structure of the SMASh degron tag.

Figure S2. Expression vectors used for transfecting EL4 and Jurkat cells.

Figure S3. Time course of mCherry degradation and reexpression in EL4 cells.

Figure S4. Flow cytometric analyses of Jurkat cells on day 4 after treatment with asunaprevir (ASV).

Figure S5. Generation and genotyping of mCherry-SMASh knock-in mice.

Figure S6. Flow cytometric analyses of splenocytes three days after treatment with concanavalin A.

Figure S7. PD-1 expression in wild-type T cells was not changed with ASV or grazoprevir (GRV) treatment.

Figure S8. MC-38 cell growth on ASV treatment for knock-in (KI) and anti-PD-1 treatment for wild-type (WT) mice.

Figure S9. Flow cytometric analyses of the tumor microenvironment of the MC-38 cell mass on day 14 of ASV administration in KI mice.

Figure S10. Tumor-infiltrating immune cells in WT mice with asunaprevir (ASV) treatment.

Figure S11. Quantification of donor cell ratio in bone marrow chimeric mice by quantitative genomic PCR for mCherry and *Bcl2*.

Table S1. Genotypes of offspring obtained after intercrossing heterozygous knock-in mice

Table S2. Primer sequences

Table S3. Antibodies used in this study

Table S4. Combinations of antibodies and dead-cell indicator for flow cytometry

Table S5. *F* values and *P* values of ANOVA

## Supplemental Figures

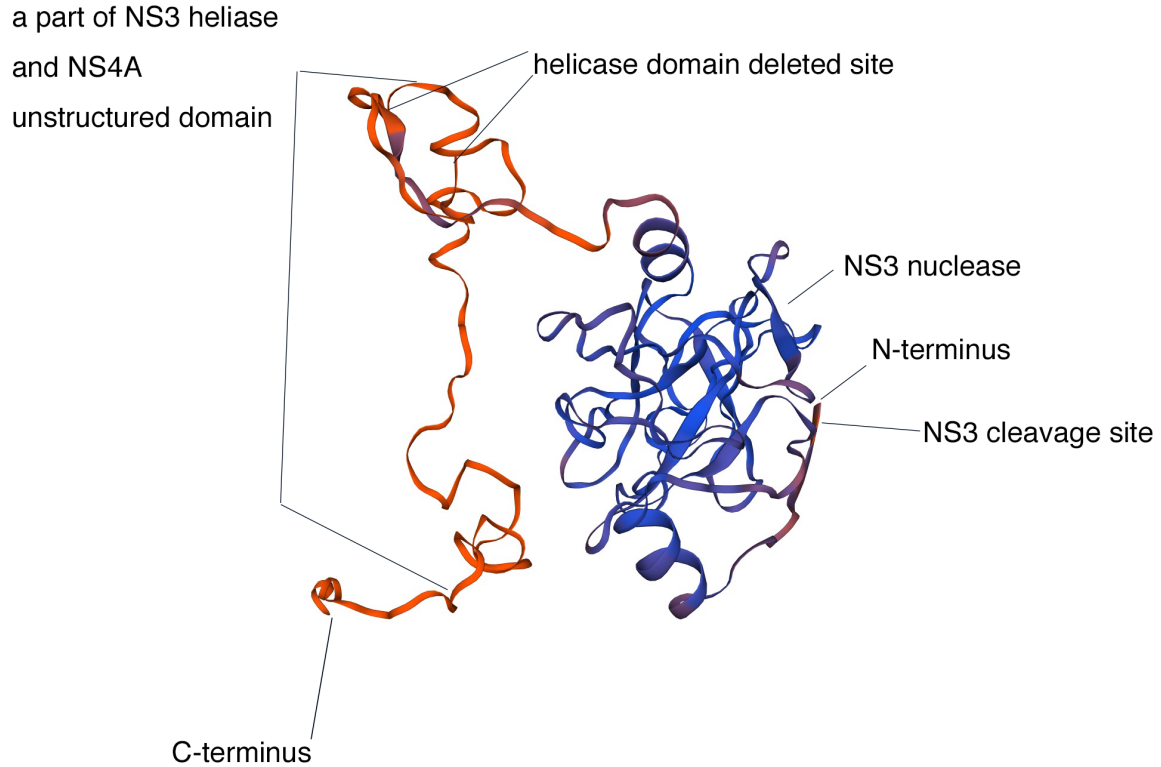

**Figure S1 (related to Figure 1) Structure of the SMASH degron tag.**

The structure was modeled using SWISS-MODEL (<https://swissmodel.expasy.org/>) using the SMASH amino acid sequence shown in Chung et al. *Nature chemical biology* **11** 713 (2015) DOI: 10.1038/NCHEMBIO.1869. The helicase domain deleted sites are connected, but they are drawn apart by SWISS-MODEL in this figure.

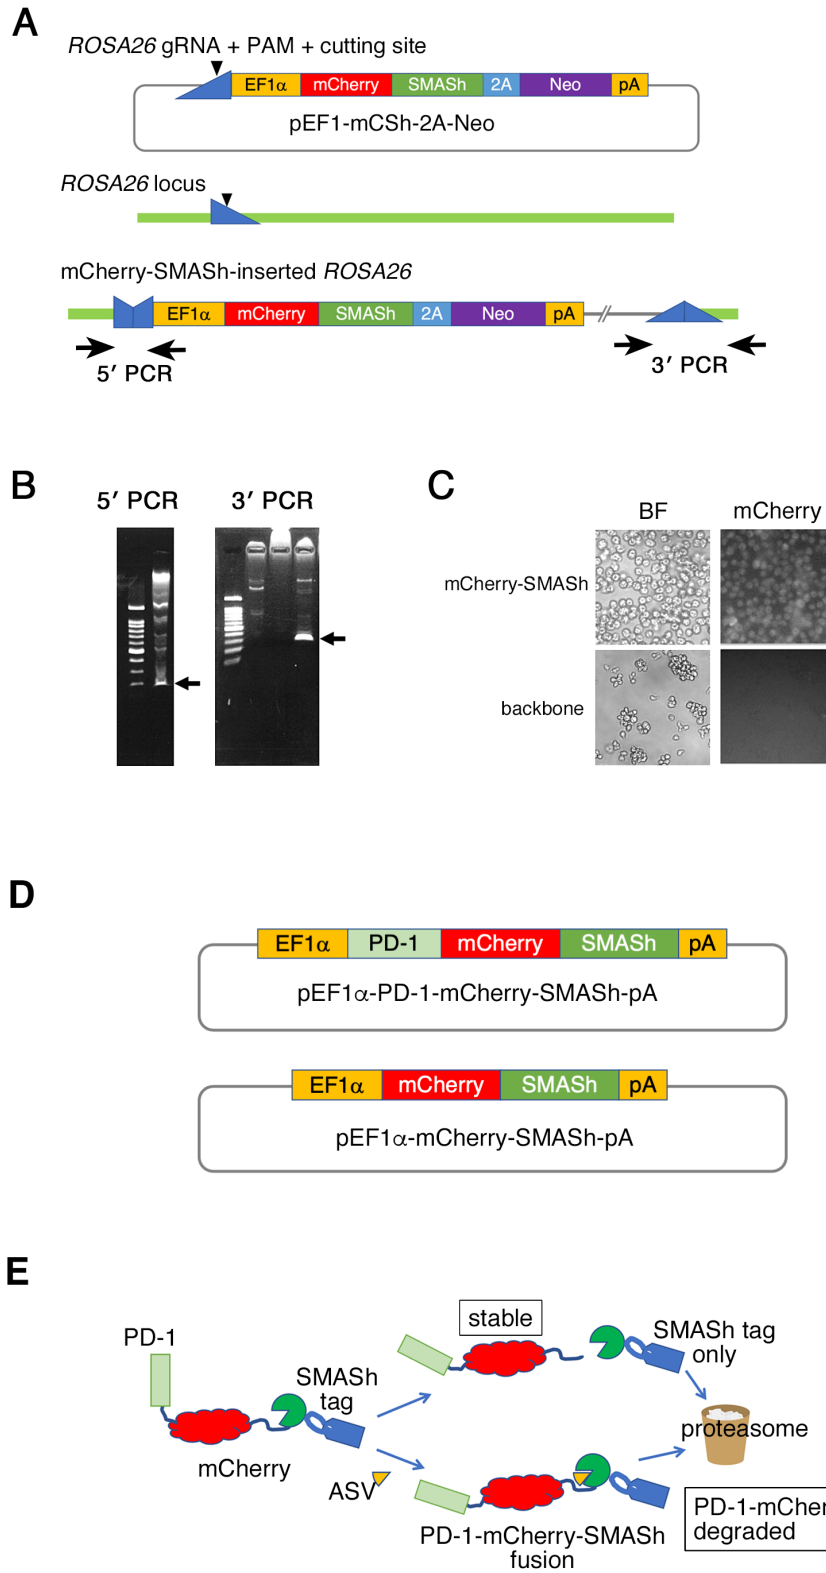

**Figure S2 (related to Figure 1). Expression vectors used for transfecting EL4 and Jurkat cells.**

**A** The *mCherry-SMASH*-expressing vector (EL4 cells; top), *ROSA26* locus (middle), and vector inserted in the *ROSA26* locus (bottom). Blue triangles indicate the guide RNA sequence. Arrowheads indicate digestion sites in Cas9-gRNA. Arrows indicate the primers used for PCR. **B** PCR for confirming the integration of *mCherry-SMASH*-expressing vector into the *ROSA26* locus. Arrows indicate the 160 bp product by 5' PCR and 354 bp product by 3' PCR. **C** Fluorescent mCherry (right) and bright-field (BF) images (left) after G418 selection of EL4 cells following transfection with the *mCherry-SMASH*-expressing vector (top) and backbone vector (bottom). **D** Construction of *Pdcd1-mCherry-SMASH*-expressing vector (top) and the *mCherry-SMASH*-expressing vector (Jurkat cells; bottom). **E** Schematic diagram of the SMASH degron system in the PD-1-mCherry fusion protein. EF1 $\alpha$ , human elongation factor 1 $\alpha$  promoter; PD-1, mouse *Pdcd1* cDNA; mCherry, monomeric derivative of DsRed fluorescent protein sequence; SMASH, Small molecule-assisted shutoff degron tag; 2A, 2A self-cleaving peptide sequence from *Thosea asigna* virus; Neo, neomycin resistance gene; pA, SV40 poly(A) additional signal; ASV, asunaprevir.

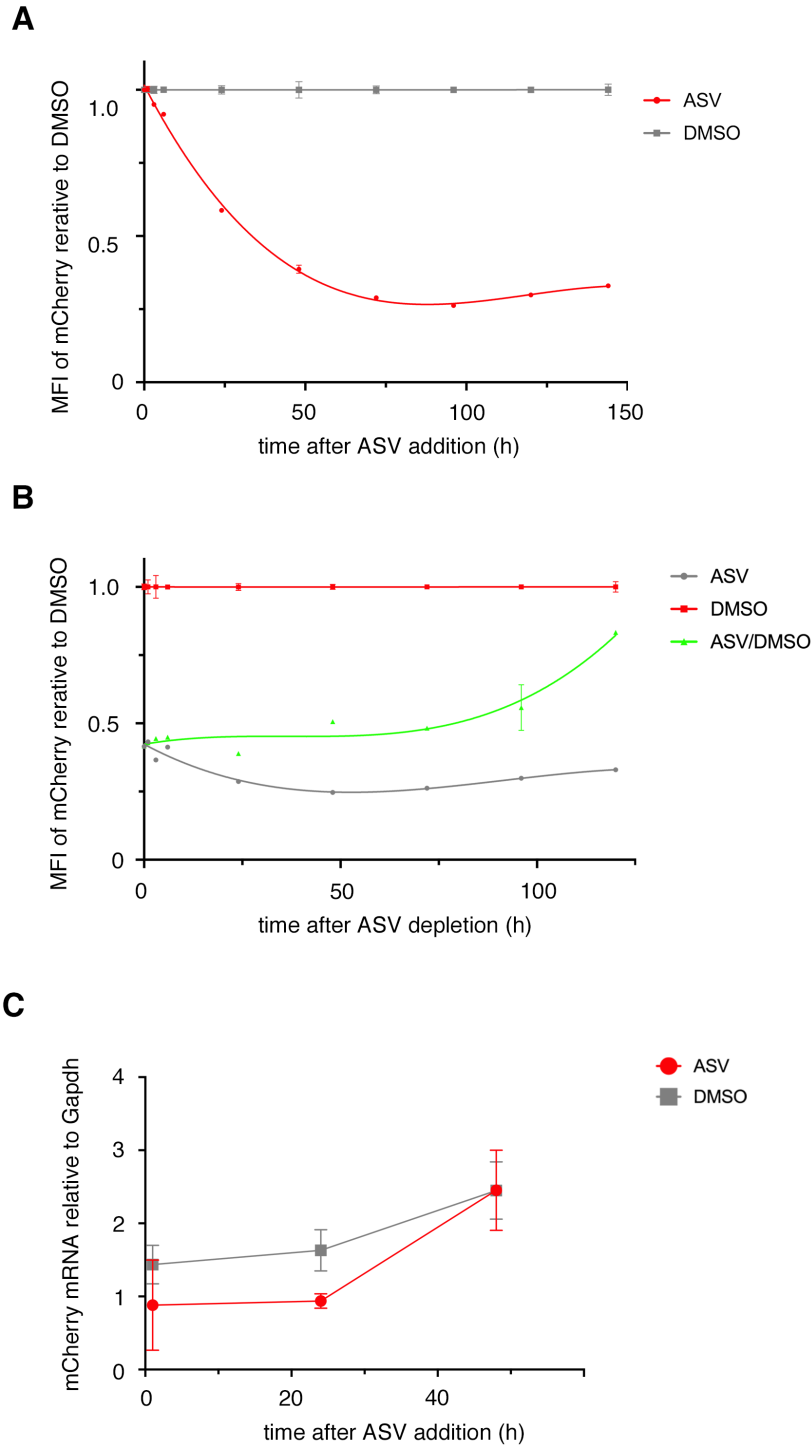

**Figure S3 (related to Figure 1). The time course of the amount of mCherry protein and mRNA in mCherry-SMASH-expressing EL4 with ASV and removal of ASV.**

**A, B** The time course of the fluorescence intensity of mCherry in mCherry-SMASH-expressing EL4 cells with 10  $\mu$ M ASV treatment (**A**) and removal of ASV after 48 h-treatment with

ASV (**B**). Third-order regression curves were drawn using Prism 9. Each data was obtained from three independent samples. Data are represented as mean  $\pm$  standard error (SE). Some error bars are shorter than the size of the symbols. **C** The time course of the amount of mCherry mRNA, measured by RT-qPCR. Each data was obtained from three independent samples. Data are represented as mean  $\pm$  SE. Two-tailed unpaired *t*-test showed no difference between the ASV-treated group (ASV) and the untreated group (DMSO).

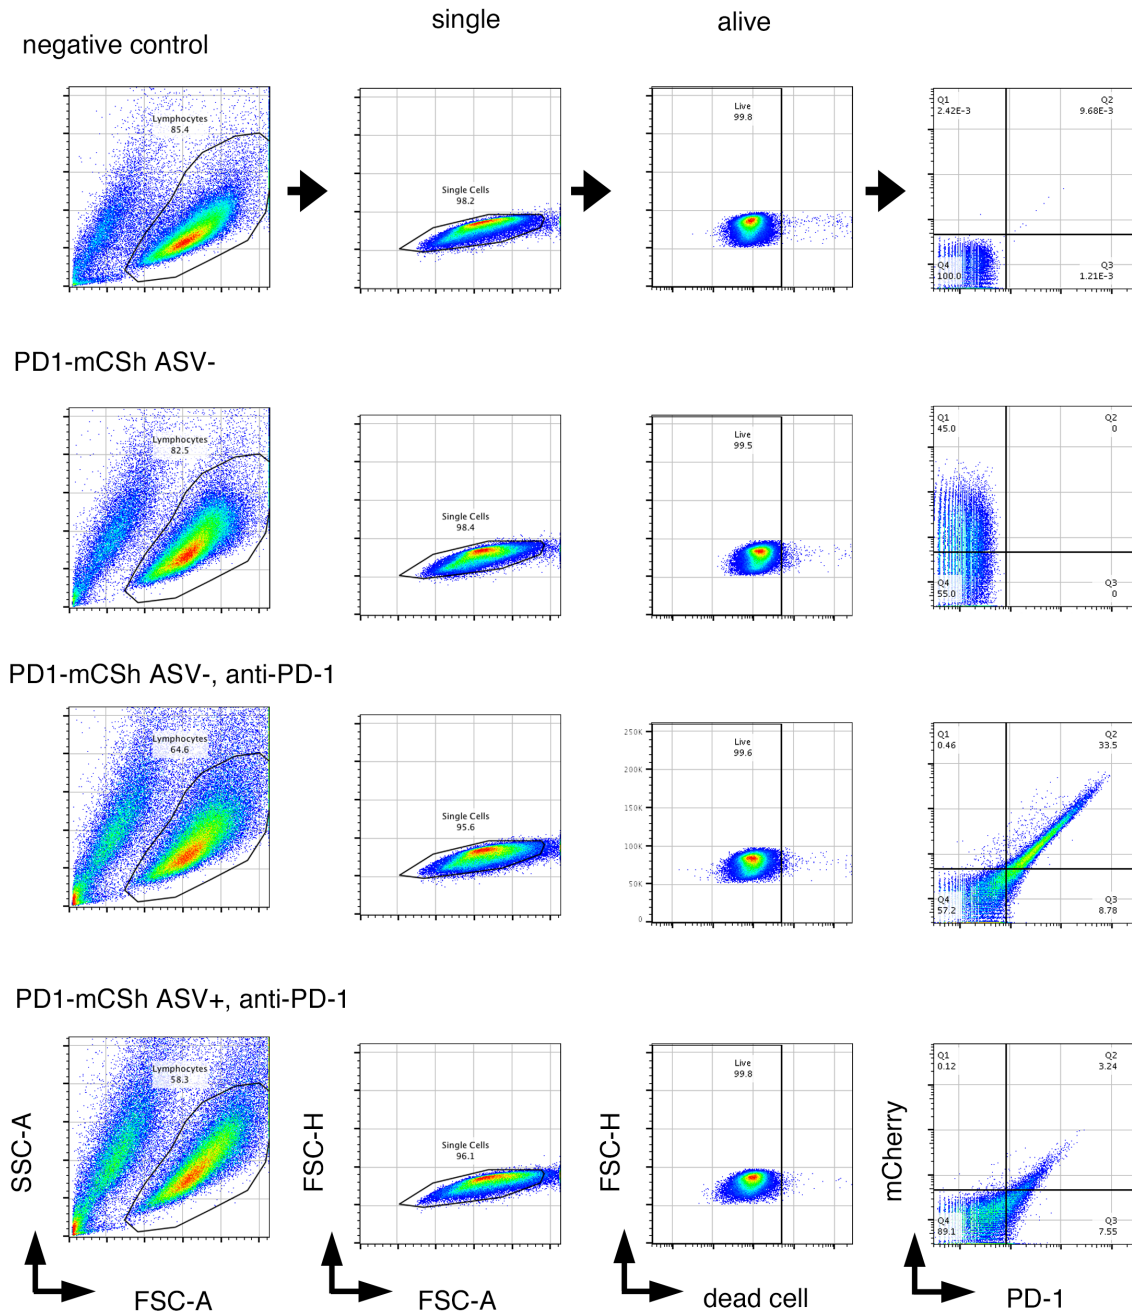

**Figure S4 (related to Figure 1). Flow cytometric analyses of Jurkat cells on day 4 after treatment with asunaprevir (ASV).**

Expression analysis of PD-1 and mCherry in Jurkat cells transfected with the vector backbone (negative control), PD-1-mCSh-expressing cells without ASV (PD1-mCSh ASV-), anti-PD-1-immunostained PD-1-mCSh-expressing cells without ASV (PD1-mCSh ASV-, anti-PD-1), and anti-PD-1-immunostained PD-1-mCSh-expressing cells with ASV (PD1-mCSh ASV+, anti-PD-1) using flow cytometry.

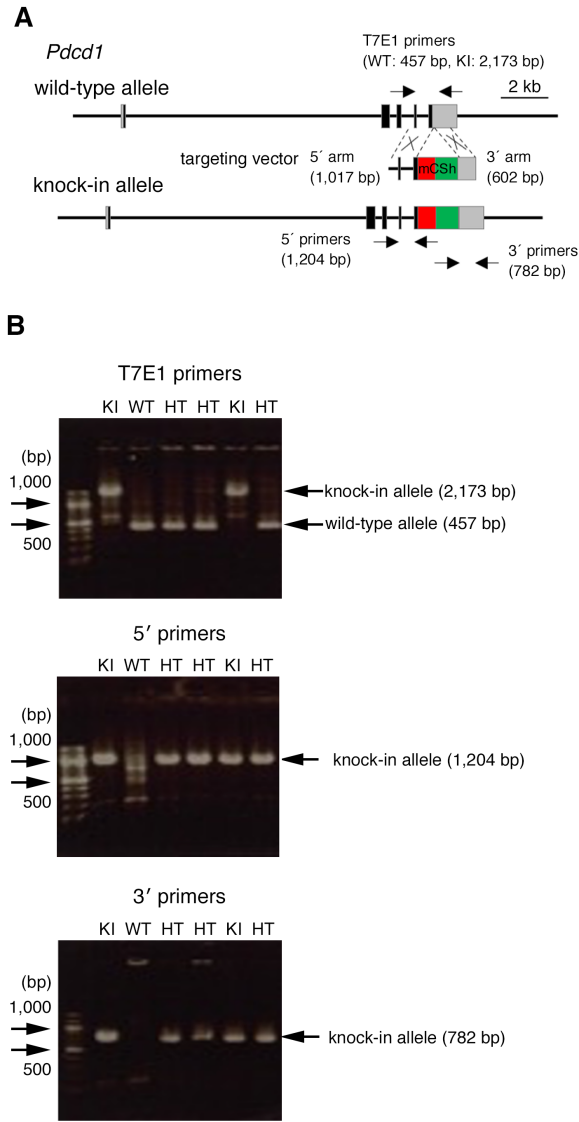

**Figure S5 (related to Figure 2). Generation and genotyping of mCherry-SMASH knock-in mice.**

**A** Strategy for insertion of mCherry-SMASH downstream of the PD-1 coding region. Black box: protein-coding region in *Pdccl1* exons, grey box: non-coding region in the last exon, red box: mCherry gene, green box: SMASH degron tag, arrows: PCR primers for genotyping. **B** Genotyping of wild-type (WT), heterozygous mutant (HT) and homozygous mutant (KI) mice by PCR using T7E1 primers, 5' primers, and 3' primers shown in Figure 2A. The PCR products of the knock-in and the wild-type alleles are indicated by arrows. As the PCR product of the knock-in allele (2,173 bp) obtained using the T7E1 primers was longer than that obtained for the wild-type allele (457 bp) in heterozygotes, the longer knock-in allele PCR product could not be detected owing to competition for amplification with the shorter wild-type allele PCR product.



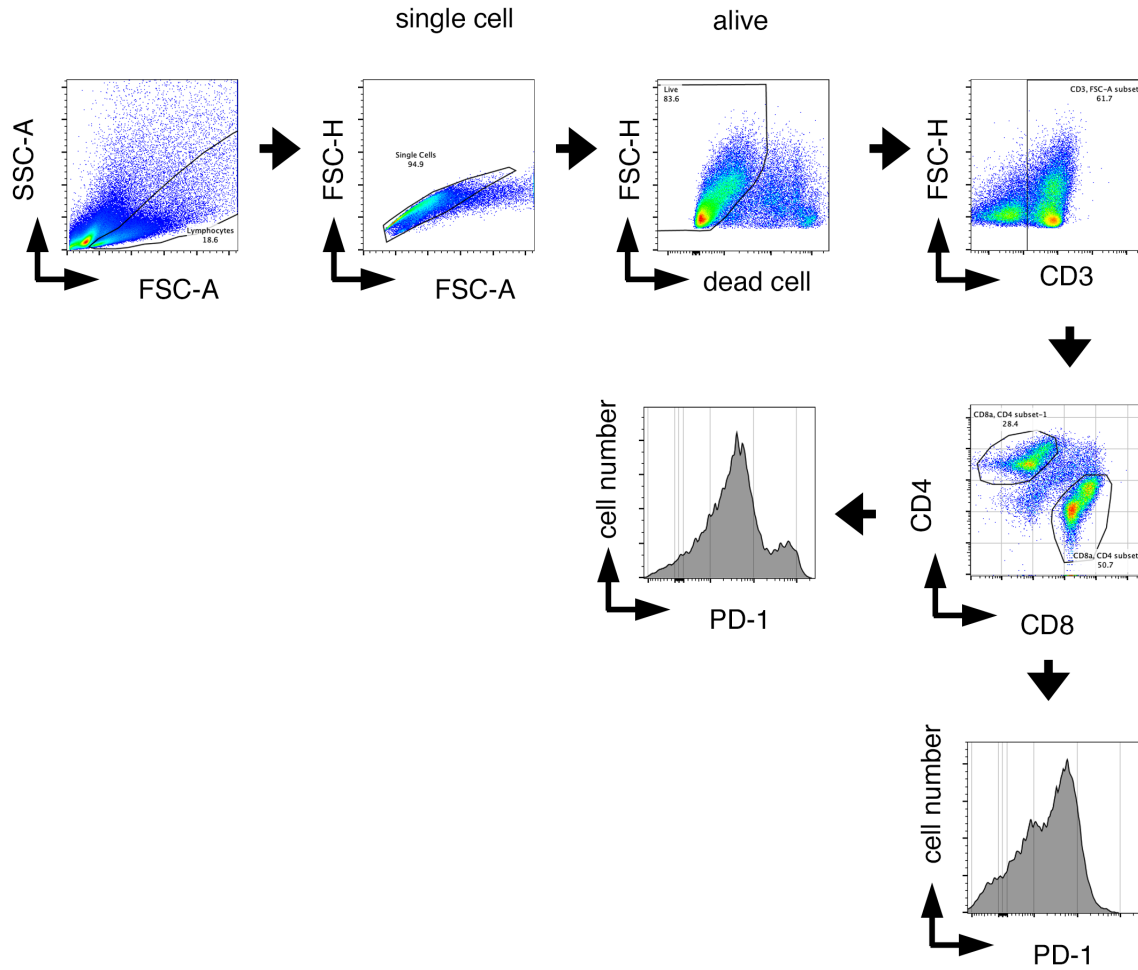

**Figure S6 (related to Figure 2). Flow cytometric analyses of splenocytes three days after treatment with concanavalin A.**

Analysis of PD-1 and mCherry expression in PD-1-mCherry-SMASH knock-in homozygous CD3<sup>+</sup> T cells from splenocytes by flow cytometry.

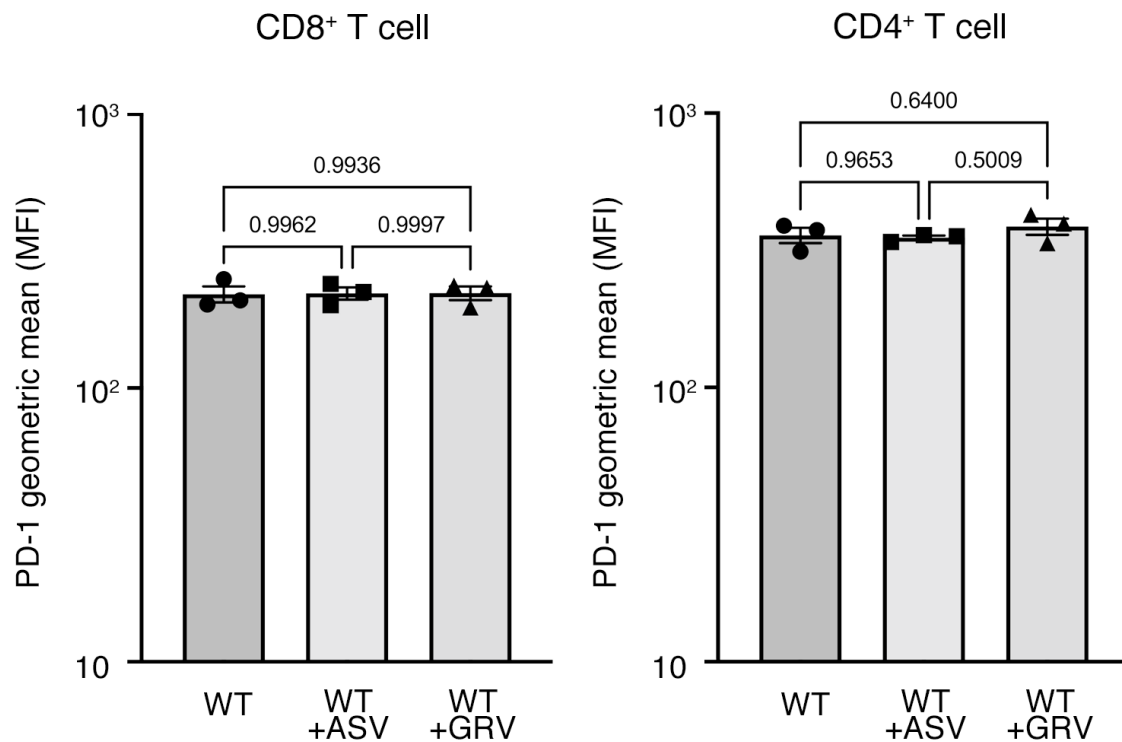

**Figure S7 (related to Figure 2). PD-1 expression in wild-type T cells stimulated by concanavalin A with ASV or GRV treatment.**

The geometric means of fluorescence intensity of PD-1-FITC in wild-type CD8<sup>+</sup> (left) and CD4<sup>+</sup> (right) T cells with and without ASV or GRV. The experiment was performed independently for splenocytes from three mice. The experiment was performed once. A geometric mean of each sample was calculated by subtraction of the geometric mean stained with isotype control from that stained with anti-PD-1 antibody. Data are represented as mean  $\pm$  SE. *P* values obtained by one-way ANOVA were shown in the graph.

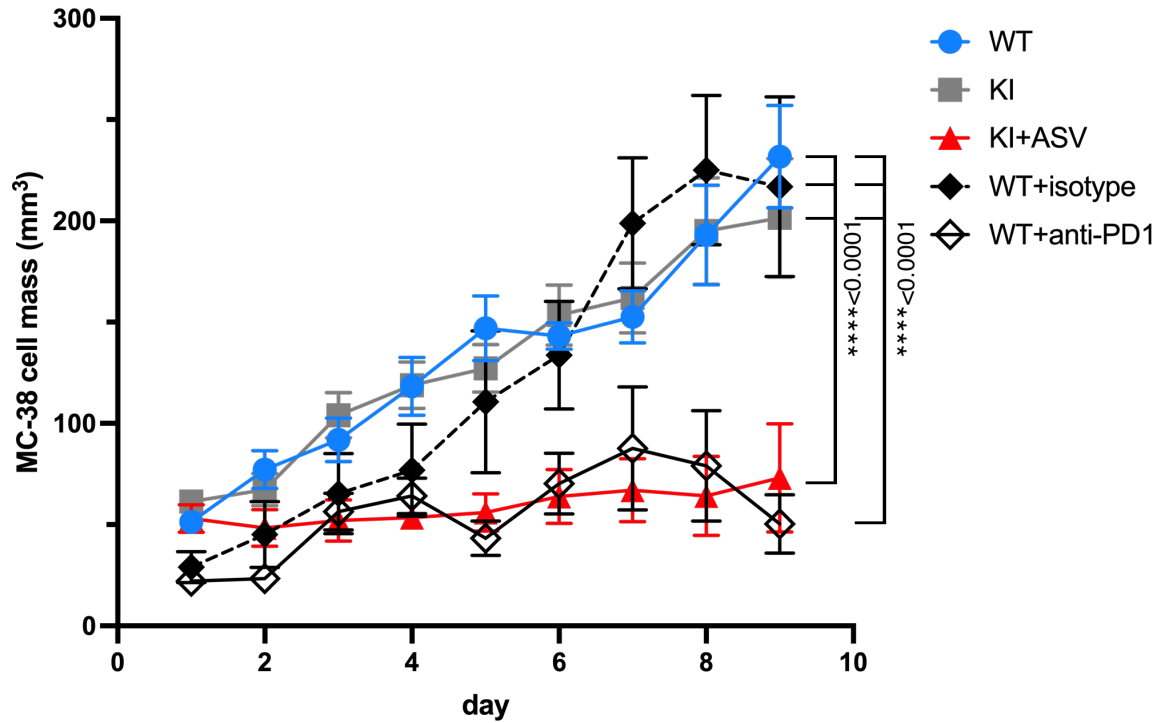

**Figure S8 (related to Figure 3) MC-38 cell growth on ASV treatment for knock-in (KI) mice and anti-PD-1 treatment for wild-type (WT) mice.**

Growth curve of MC-38 cells in WT with solvent (WT, n = 14), KI with solvent (KI, n = 19), KI with asunaprevir (KI+ASV, n = 15), WT with isotype control (WT+isotype, n = 6) and WT with anti-PD-1 antibody treatment (WT+anti-PD1, n = 6). One million MC-38 cells were injected subcutaneously, and MC-38 cell masses were measured after 4 days. When cell masses reached a volume greater than 45 mm<sup>3</sup>, the administration of was initiated. The experiment for WT+isotype control and WT+anti-PD-1 antibody treatment was performed once. The experiment for WT, KI, and KI+ASV was repeated three times. The results are represented as a single graph. \*\*\*\**p* < 0.0001; ordinary two-way ANOVA.

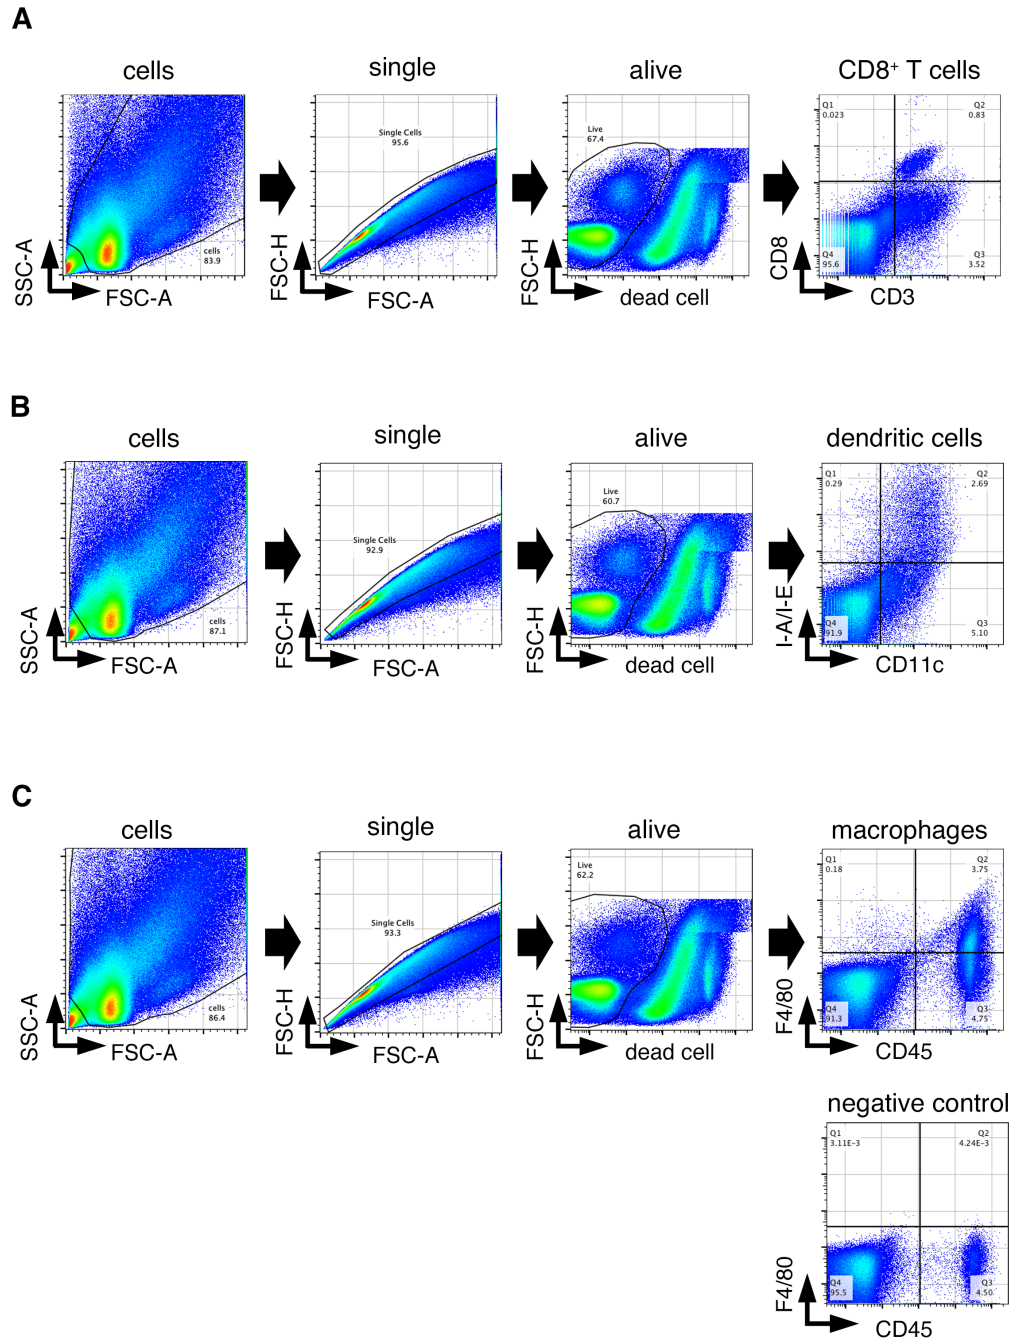

**Figure S9 (related to Figure 4). Flow cytometric analyses of the tumor microenvironment of the MC-38 cell mass on day 14 of asunaprevir (ASV) administration in knock-in (KI) mice.**

**A** Separation of CD8<sup>+</sup> T cells using anti-CD3 and anti-CD8 antibodies for expression analyses of PD-1, TIM-3, LAG-3, IFN $\gamma$ , CD44, and CD103. **B** Separation of dendritic cells using anti-CD11c and anti-I-A/I-E antibodies. **C** Separation of monocytes and macrophages using anti-CD45 and anti-F4/80 antibodies. The bottom panel shows the negative control for the anti-F4/80 antibody.

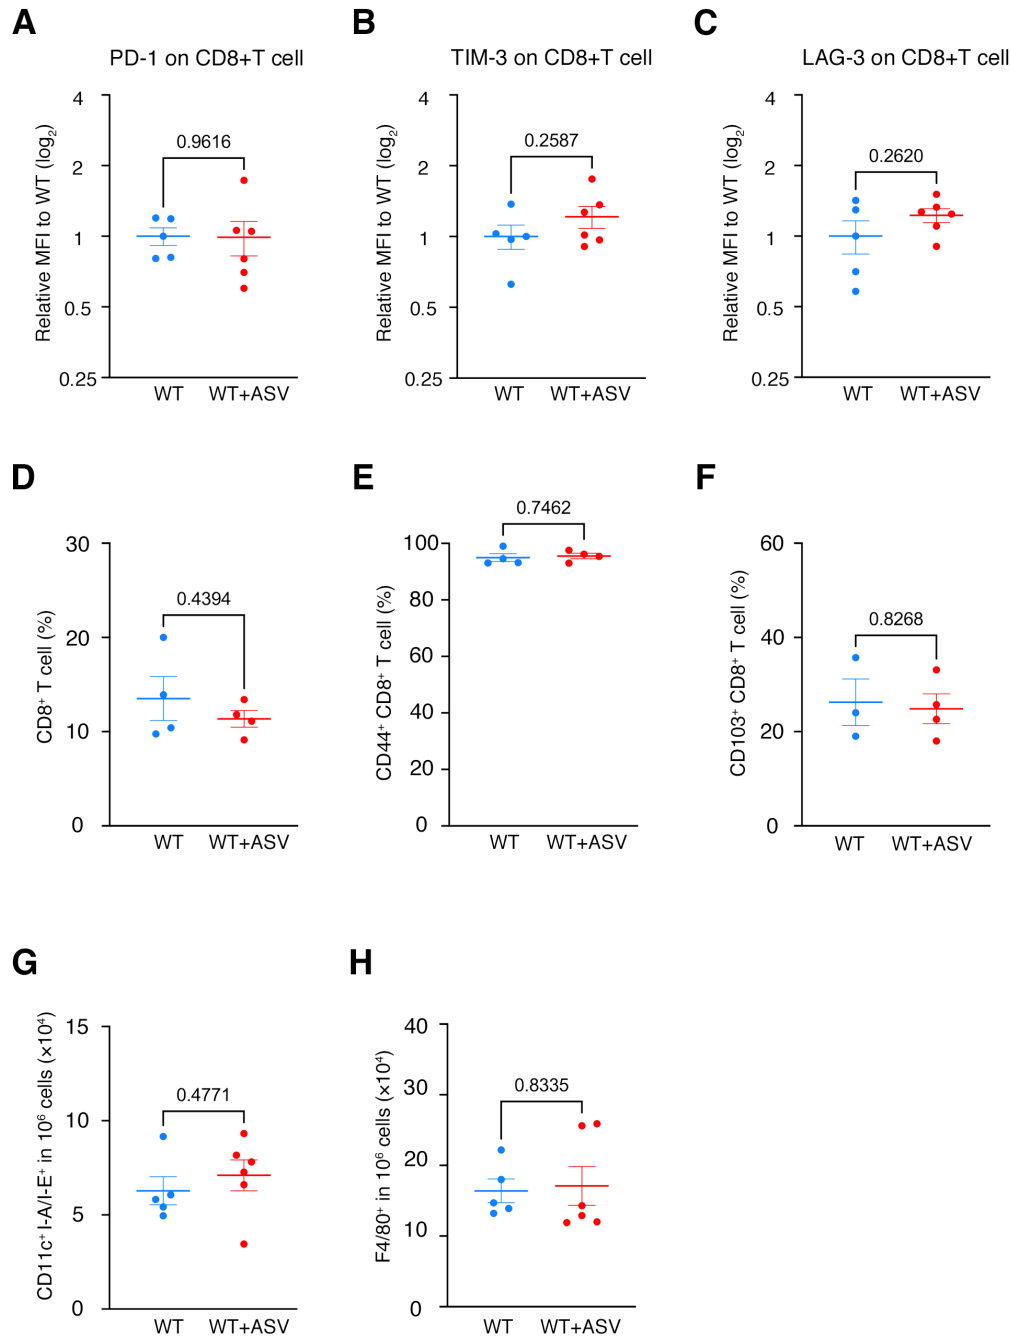

**Figure S10 (related to Figure 4). Tumor-infiltrating immune cells in wild-type (WT) mice with asunaprevir (ASV) treatment.**

**A-C** Cell -surface expression of PD-1 (**A**), TIM-3 (**B**), and LAG-3 (**C**) in CD8<sup>+</sup> T cells in the microenvironment of MC-38 cell masses. WT (blue, n = 5) and WT+ASV (red, n = 6), biologically independent samples. **D-F** The ratios of tumor-infiltrating CD8<sup>+</sup> T cells in CD45<sup>+</sup> cells (**D**), CD44<sup>+</sup>CD8<sup>+</sup> effector T cells (**E**) and CD103<sup>+</sup>CD8<sup>+</sup> residual memory T cells (**F**) analyzed by flow cytometry. WT (blue, n = 4 in **D** and **E**, n = 3 in **F**) and WT+ASV (red, n = 4), biologically

independent samples. **G, H** The numbers of tumor-infiltrating dendritic cells (**G**) and macrophages (**H**) in  $10^6$  cells of microenvironment. WT (blue, n = 5) and WT+ASV (red, n = 6), biologically independent samples. Data are represented as mean  $\pm$  standard error (SE). *P* values obtained by unpaired two-tailed *t*-tests are shown in the graph. The experiment was conducted once.

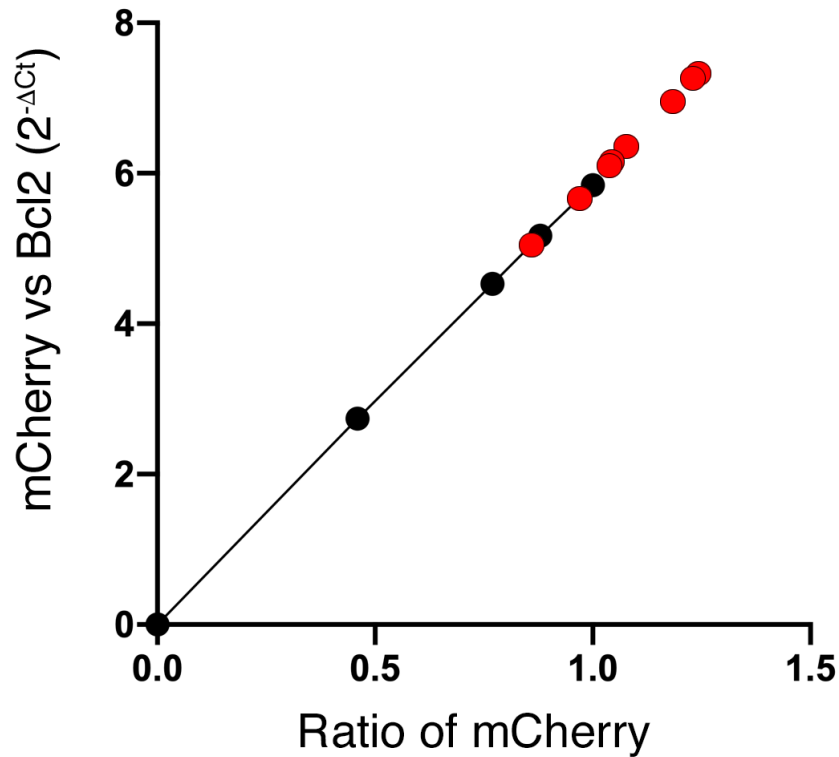

**Figure S11 (related to Figure 5). Quantification of donor cell ratio in bone marrow chimeric mice by quantitative genomic PCR for mCherry and *Bcl2*.**

An example of the quantification of donor cell ratio. The standard curve for calculating the ratio of mCherry<sup>+</sup> knock-in (KI) cells vs wild-type (WT) cells in peripheral blood at day 40 after transplantation of KI bone marrow cells (BMCs) into WT mice. Twenty nanograms of genomic DNA was used for quantitative PCR for *mCherry* in KI cells and the amount of *Bcl2* was used as the reference. The genomic DNA derived from the peripheral blood of WT and KI mice was adjusted so that the content of the KI genome was 0%, 46%, 77%, 88%, and 100%. The percentage of KI cells was estimated by fitting the regression line to the results of quantitative PCR using genomic DNA derived from the peripheral blood of mice transplanted with KI BMCs. Black: standard sample (KI/WT = 0, 0.46, 0.77, 0.88 and 1, respectively), red: peripheral blood from WT recipient mice transplanted with KI BMCs (n = 8). KI, knock-in; WT, wild-type; BMCs, bone marrow cells.

## Supplemental Tables

**Table S1. Genotypes of offspring obtained after intercrossing heterozygous knock-in mice.**

| Wild-type  | Heterozygote | Homozygote |
|------------|--------------|------------|
| 45 (30.2%) | 70 (47.0%)   | 34 (22.8%) |



**Table S2. Primer sequences.**

| Primer No. | Forward (5' to 3' )                                       |
|------------|-----------------------------------------------------------|
| 1          | CACCGCTCCAGTCTTTCTAGAAGA                                  |
| 2          | CGAGCTCAAGCTTCAATTCTGATGAGATGGAAGAGTGCTCTC                |
| 3          | AATCCTGGCCCATTTATGGGATCGGCCATTGAACAAG                     |
| 4          | TCTGCTAACATGCGGTGACGTGAGGAGAATCCTGGCCCATTTAAATTCTGCAATTCA |
| 5          | GCCTCTGGCTTCTGAGGAC                                       |
| 6          | CCAGGGACCGTCGTAAACT                                       |
| 7          | GACCATGGTGGCGACCGGTA                                      |
| 8          | CGGTGCCACCATGGTCGACATGTGGGTCCGGCAGGTAC                    |
| 9          | AACTTGTTTATTGCAGCTTATAATGGTTAC                            |
| 10         | AACTTGTTTATTGCAGCTTATAATGGTTAC                            |
| 11         | TCTTGGCCTCTTAGTGGAGGCGGAGGTGGAGTGAGCAAGGGCGAGGAGG         |
| 12         | GAACGGCCACGAGTTCGAGA                                      |
| 13         | GTCTCCTCTGACTTCAACAGCG                                    |
| 14         | GTGCTTGCCCATGGTGTAGA                                      |
| 15         | ATCTGACCAGATTCTTCAGCCATTAG                                |
| 16         | TCTTGGCCTCTTGATAGTGGAGGCGGAGGTGGA                         |
| 17         | CACCGCTGAAGAATCTGGTCAAAG                                  |
| 18         | TGTTGTGGTACACCAGGAAAGG                                    |
| 19         | GGTGTTACGGACAACCTCT                                       |
| 20         | GAACGGCCACGAGTTCGAGA                                      |
| 21         | AAGCTGTCACAGAGGGGCTA                                      |
| Primer No. | Reverse (5' to 3' )                                       |
| 1          | AAACTCTTCTAGAAAGACTGGAGC                                  |
| 2          | TTGAATTGCAGAATTGTAGAGAACCTCCCTGTCAGGTATAATTG              |
| 3          | TGAATTGCAGAATTTGGTACCTCAGAAGAACTCGTCAAGAAGGCGAT           |
| 4          | TCGACGTCACCGCATGTTAGCAGACTTCTCTGCCCTCAAATTTGTAGAGAAC      |
| 5          | CCAACTTCTCGGGGACTGTG                                      |
| 6          | AAATACTCCGAGGCGGATCA                                      |
| 7          | GACGGACTCAGATCTCGAGCTCAA                                  |
| 8          | CGAGATCTGAGTCCGTCGATAAGAGGCCAAGAACAATGTCCATCC             |
| 9          | AAGAGGCCAAGAACAATGTCCATCCTAA                              |
| 10         | AGTACTAAGAGGCCAAGAACAATGTCCATCC                           |
| 11         | AATAAACAAGTTAGTTTAGTAGAGAACCTCCCTGTCAGGTATAATTG           |
| 12         | CTTGGAGCCGTACATGAACTGAGG                                  |
| 13         | ACCACCCTGTTGCTGTAGCCAA                                    |
| 14         | GGACAGCAGATACGCTCAG                                       |
| 15         | ATCAAGAGGCCAAGAACAATGTCCAT                                |
| 16         | AGAATCTGGTCAGATTTTGTAAACCATTATAAGCTGCAATAAACA             |
| 17         | AAACCTTTGACCAGATTCTTCAGC                                  |
| 18         | ATGATGGCCATGTTATCCTCCT                                    |
| 19         | GGTGATGCCTGCCCTACTTA                                      |
| 20         | CTTGGAGCCGTACATGAACTGAGG                                  |
| 21         | CAGGCTGGAAGGAGAAGATG                                      |

**Table S3. Antibodies used in this study.**

| Antigen                        | Clone       | Conjugate     | Company   |                  | No.           | Purpose | Dilution    |
|--------------------------------|-------------|---------------|-----------|------------------|---------------|---------|-------------|
| mCherry                        | Polyclonal  |               | GeneTex   | CA, US           | GTX<br>128508 | WB      | 1/5,000     |
| ACTB ( $\beta$ -actin)         | Polyclonal  |               | Bioss     | MA, US           | bs-0061R      | WB      | 1/2,000     |
| PD-1                           | EPR20665    |               | Abcam     | Cambridge,<br>UK | ab214421      | WB      | 1/2,000     |
| Rabbit IgG                     | Polyclonal  | HRP           | Abcam     | Cambridge,<br>UK | ab6721        | WB      | 1/10,000    |
| CD3                            | 17A2        | APC/Cy7       | Biolegend | CA, US           | 100222        | FCM     | recommended |
| CD3                            | 17A2        | Pacific Blue  | Biolegend | CA, US           | 100214        | FCM     | recommended |
| CD8a                           | 53-6.7      | AlexaFluor700 | Biolegend | CA, US           | 100729        | FCM     | recommended |
| PD-1                           | 29F.1A12    | FITC          | Biolegend | CA, US           | 135214        | FCM     | recommended |
| Isotype control                | RTK2758     | FITC          | Biolegend | CA, US           | 400506        | FCM     | recommended |
| TIM-3                          | RMT3-23     | PE/Cy7        | Biolegend | CA, US           | 119715        | FCM     | recommended |
| Isotype control                | RTK2758     | PE/Cy7        | Biolegend | CA, US           | 400521        | FCM     | recommended |
| LAG-3                          | C9B7W       | PerCP/Cy5.5   | Biolegend | CA, US           | 125211        | FCM     | recommended |
| Isotype control                | RTK2071     | PerCP/Cy5.5   | Biolegend | CA, US           | 400425        | FCM     | recommended |
| CD103                          | 2E7         | PE/Cy7        | Biolegend | CA, US           | 121425        | FCM     | recommended |
| CD44                           | IM7         | BV421         | Biolegend | CA, US           | 103039        | FCM     | recommended |
| CD45                           | 30-F11      | PE            | Biolegend | CA, US           | 103105        | FCM     | recommended |
| F4/80                          | BM8         | APC/Cy7       | Biolegend | CA, US           | 123117        | FCM     | recommended |
| CD11c                          | N418        | FITC          | Biolegend | CA, US           | 117305        | FCM     | recommended |
| I-A/I-E                        | M5/114.15.2 | PE/Cy7        | Biolegend | CA, US           | 107615        | FCM     | recommended |
| IFN $\gamma$                   | XMG1.2      | Pacific Blue  | Biolegend | CA, US           | 505817        | FCM     | recommended |
| Fc $\gamma$ R<br>CD16/<br>CD32 | 2.4G2       |               | TONBO     | CA, US           | 70-0161       | FCM     | recommended |

WB, Western blotting; FCM, flow cytometry.

**Table S4. Combinations of antibodies and dead-cell indicator for flow cytometry.**

|                           |           |               |
|---------------------------|-----------|---------------|
| CD3                       | 17A2      | Pacific Blue  |
| CD8a                      | 53-6.7    | AlexaFluor700 |
| PD-1                      | 29F.1A12  | FITC          |
| TIM-3                     | RMT3-23   | PE/Cy7        |
| LAG-3                     | C9B7W     | PerCP/Cy5.5   |
| SYTOX Red Dead Cell Stain |           |               |
| FcgammaR                  | CD16/CD32 |               |

|                           |           |               |
|---------------------------|-----------|---------------|
| CD3                       | 17A2      | Pacific Blue  |
| CD8a                      | 53-6.7    | AlexaFluor700 |
| PD-1 isotype control      | RTK2758   | FITC          |
| TIM-3 isotype control     | RTK2758   | PE/Cy7        |
| LAG-3 isotype control     | RTK2071   | PerCP/Cy5.5   |
| SYTOX Red Dead Cell Stain |           |               |
| FcgammaR                  | CD16/CD32 |               |

|                           |           |               |
|---------------------------|-----------|---------------|
| CD3                       | 17A2      | Pacific Blue  |
| CD8a                      | 53-6.7    | AlexaFluor700 |
| CD44                      | IM7       | BV421         |
| SYTOX Red Dead Cell Stain |           |               |
| FcgammaR                  | CD16/CD32 |               |

|                           |           |               |
|---------------------------|-----------|---------------|
| CD3                       | 17A2      | Pacific Blue  |
| CD8a                      | 53-6.7    | AlexaFluor700 |
| CD103                     | 2E7       | PE/Cy7        |
| SYTOX Red Dead Cell Stain |           |               |
| FcgammaR                  | CD16/CD32 |               |

|                           |           |               |
|---------------------------|-----------|---------------|
| CD3                       | 17A2      | APC/Cy7       |
| CD8a                      | 53-6.7    | AlexaFluor700 |
| IFNgamma                  | XMG1.2    | Pacific Blue  |
| SYTOX Red Dead Cell Stain |           |               |
| FcgammaR                  | CD16/CD32 |               |

|                           |             |        |
|---------------------------|-------------|--------|
| CD11c                     | N418        | FITC   |
| I-A/I-E                   | M5/114.15.2 | PE/Cy7 |
| SYTOX Red Dead Cell Stain |             |        |
| FcgammaR                  | CD16/CD32   |        |

|                           |           |         |
|---------------------------|-----------|---------|
| CD45                      | 30-F11    | PE      |
| F4/80                     | BM8       | APC/Cy7 |
| SYTOX Red Dead Cell Stain |           |         |
| FcgammaR                  | CD16/CD32 |         |

**Table S5. *F* values and *P* values of ANOVA.**

Figure 3C

| ANOVA table   | <i>F</i> (DFn, DFd)       | <i>P</i> value |
|---------------|---------------------------|----------------|
| Time          | $F(1.944, 56.36) = 17.29$ | $p < 0.0001$   |
| Column Factor | $F(2, 27) = 10.61$        | $p = 0.0004$   |
| Subject       | $F(27, 232) = 5.577$      | $p < 0.0001$   |

Figure 3F

| ANOVA table   | <i>F</i> (DFn, DFd)       | <i>P</i> value |
|---------------|---------------------------|----------------|
| Time          | $F(1.299, 24.68) = 12.82$ | $p = 0.0007$   |
| Column Factor | $F(1, 19) = 4.493$        | $p = 0.0474$   |
| Subject       | $F(19, 190) = 9.107$      | $p < 0.0001$   |

Figure 5C

| ANOVA table   | <i>F</i> (DFn, DFd)       | <i>P</i> value |
|---------------|---------------------------|----------------|
| Time          | $F(2.125, 29.75) = 8.975$ | $p = 0.0007$   |
| Column Factor | $F(2, 14) = 10.49$        | $p = 0.0016$   |
| Subject       | $F(14, 196) = 14.08$      | $p < 0.0001$   |
